# Supplementary material for: Is a Parry Fracture—An Isolated Fracture of the Ulnar Shaft—Associated with the Probability of Abuse in Children between 2 and 16 Years Old?
Source: MDPI journal article supplement (doi:10.3390/children8080650), 2021-07-28
Supplement: s1 [file s1]

Table S1. Assessor agreement for the radiographic classifications

|          | AO<br>Pediatric | Paleo-<br>pathology |
|----------|-----------------|---------------------|
| Within   |                 |                     |
| X1 vs X2 | 0.541           | 0.585               |
| Y1 vs Y2 | 0.386           | 0.640               |
| Z1 vs Z2 | 0.502           | 0.833               |
| Between  |                 |                     |
| X1 vs Y1 | 0.413           | 0.137               |
| X2 vs Y2 | 0.275           | 0.348               |
| X1 vs Z1 | 0.448           | 0.373               |
| X2 vs Z2 | 0.609           | 0.556               |
| Y1 vs Z1 | 0.333           | 0.494               |
| Y2 vs Z2 | 0.289           | 0.444               |

*Cohen's kappa corrects for agreement based on chance and is well suited for categorical variables. A value above 0.6 is regarded as substantial agreement.*
